# Supplementary material for: Evidence of overfishing of geoduck clam Panopea globosa from a length-based stock assessment approach
Source: PeerJ. 2020 Jun 4;8:e9069. doi: 10.7717/peerj.9069 (PMC7276149; doi:10.7717/peerj.9069)
Supplement: Data S1 [file peerj-08-9069-s002.xlsx]

## Sheet: Shell length & Weight
Time	Shell length (mm)	Weight (gr)
2010	154	1395
2010	151	1510
2010	161	1450
2010	152	1440
2010	179	1335
2010	167	1730
2010	165	1675
2010	171	1700
2010	171	1995
2010	150	1295
2010	150	1280
2010	165	1710
2010	158	1305
2010	163	1775
2010	162	1535
2010	150	1545
2010	155	1290
2010	154	1280
2010	150	1310
2010	165	1775
2010	146	1480
2010	155	1485
2010	146	1285
2010	163	1190
2010	149	1545
2010	155	1350
2010	179	1735
2010	145	1365
2010	159	1730
2010	177	2020
2010	195	1180
2010	165	1350
2010	151	1105
2010	147	1230
2010	150	1185
2010	150	1490
2010	156	1320
2010	169	1500
2010	145	1095
2010	165	1545
2010	154	1420
2010	168	1465
2010	155	1760
2010	161	1580
2010	151	1330
2010	158	1340
2010	165	1650
2010	117	825
2010	162	1340
2010	155	1290
2010	156	1445
2010	136	1270
2010	170	1725
2010	163	1595
2010	145	1510
2010	155	1355
2010	155	1370
2010	150	1220
2010	145	1575
2010	156	1440
2010	156	1235
2010	155	1295
2010	151	1125
2010	155	1615
2010	170	1495
2010	148	1015
2010	163	1440
2010	169	1630
2010	160	1575
2010	160	1925
2010	156	1240
2010	155	1400
2010	160	1660
2010	158	1675
2010	155	1465
2010	166	1490
2010	180	1725
2010	180	1765
2010	153	1340
2010	156	1245
2010	160	1605
2010	182	1905
2010	159	1645
2010	157	1426
2010	165	1375
2010	159	1590
2010	156	1275
2010	150	1245
2010	168	1710
2010	151	1020
2010	150	1430
2010	174	1755
2010	162	1630
2010	168	1365
2010	162	1480
2010	157	1420
2010	153	1365
2010	145	1430
2010	154	1360
2010	151	1400
2010	153	1415
2010	146	1360
2010	158	1575
2010	165	2030
2010	133	880
2010	150	1745
2010	191	1295
2010	141	1320
2010	155	980
2010	158	1130
2010	135	1045
2010	168	1980
2010	146	1110
2010	160	1660
2010	155	1050
2010	146	1215
2010	145	1005
2010	146	1020
2010	157	1430
2010	156	1645
2010	157	1400
2010	160	1205
2010	152	1355
2010	164	1435
2010	160	1610
2010	168	1640
2010	150	1275
2010	143	1580
2010	161	1690
2010	161	1315
2010	158	1400
2010	167	1645
2010	156	1415
2010	109	1290
2010	153	1520
2010	145	1140
2010	146	1050
2010	165	1540
2010	164	1575
2010	153	1175
2010	145	1370
2010	164	1365
2010	156	1420
2010	145	1380
2010	168	1370
2010	167	1630
2010	148	1520
2010	150	1680
2010	160	1800
2010	162	1700
2010	147	1035
2010	133	1085
2010	148	1325
2010	160	1650
2010	153	1690
2010	140	1445
2010	165	1780
2010	157	1690
2010	171	1540
2010	159	1730
2010	149	1580
2010	158	1515
2010	164	1575
2010	143	1205
2010	151	1260
2010	137	1060
2010	157	1250
2010	141	1110
2010	160	1335
2010	161	1340
2010	131	930
2010	151	1420
2010	151	1340
2010	145	1310
2010	145	1190
2010	150	1000
2010	150	1190
2010	140	950
2010	151	1220
2010	165	1540
2010	147	1210
2010	165	1400
2010	150	1350
2010	160	1335
2010	134	1260
2010	166	1435
2010	155	1210
2010	156	1290
2010	146	1185
2010	144	1280
2010	138	1005
2010	131	850
2010	160	1740
2010	158	1450
2010	141	1230
2010	161	1285
2010	131	850
2010	155	1575
2010	151	1390
2010	165	1145
2010	151	1350
2010	151	1330
2010	152	1375
2010	133	980
2010	141	1240
2010	155	1310
2010	126	1010
2010	151	1370
2010	140	1250
2010	138	1155
2010	133	965
2010	169	1575
2010	145	1260
2010	140	860
2010	140	1125
2010	150	1080
2010	143	1185
2010	161	1425
2010	135	1075
2010	141	1050
2010	165	1290
2010	132	990
2010	161	1615
2010	157	1255
2010	152	1310
2010	143	1280
2010	155	1255
2010	151	1365
2010	121	715
2010	146	1050
2010	135	1010
2010	145	1190
2010	138	1200
2010	142	1130
2010	136	1005
2010	164	1310
2010	155	1245
2010	151	1370
2010	154	1285
2010	169	1460
2010	161	1710
2010	156	1565
2010	141	1345
2010	171	1990
2010	149	1415
2010	164	1610
2010	130	915
2010	150	1560
2010	153	1465
2010	154	1580
2010	162	1420
2010	169	1565
2010	139	1395
2010	144	1290
2010	147	1700
2010	132	1265
2010	137	1120
2010	154	1650
2010	145	1650
2010	153	1625
2010	156	1680
2010	154	1425
2010	169	1635
2010	139	1240
2010	144	1395
2010	159	1655
2010	149	1350
2010	164	1500
2010	160	1560
2010	154	1390
2010	163	1560
2010	153	1225
2010	152	1700
2010	174	1930
2010	164	1940
2010	156	1630
2010	157	1640
2010	160	1575
2010	137	1330
2010	164	1850
2010	154	1280
2010	158	1395
2010	163	1625
2010	157	1635
2010	160	1920
2010	144	1205
2010	147	1050
2010	138	1135
2010	160	1745
2010	154	1480
2010	153	1285
2010	167	1810
2010	163	1760
2010	172	1960
2010	157	1570
2010	165	1360
2010	155	1270
2010	164	1785
2010	155	1270
2010	164	1665
2010	161	1770
2010	161	1640
2010	161	1930
2010	169	1980
2010	180	1705
2010	159	1480
2010	169	1775
2010	157	1555
2010	162	1520
2010	144	1235
2010	152	1665
2010	161	1575
2010	162	1515
2010	152	1435
2010	177	1745
2010	168	1685
2010	164	1935
2010	172	1850
2010	155	1375
2010	161	1635
2010	146	1450
2010	157	1430
2010	134	880
2010	143	1240
2010	143	995
2010	159	1220
2010	159	1330
2010	167	1895
2010	151	1230
2010	155	1185
2010	150	1310
2010	144	1505
2010	168	1790
2010	170	2000
2010	165	1775
2010	165	1270
2010	168	1660
2010	148	1270
2010	158	1625
2010	175	2335
2010	170	1450
2010	159	1070
2010	152	1385
2010	150	1335
2010	190	1685
2010	159	1385
2010	158	1160
2010	159	1440
2010	154	1380
2010	160	1430
2010	162	1490
2010	156	1390
2010	154	1550
2010	136	935
2010	119	575
2010	130	750
2010	162	1615
2010	171	1955
2010	152	1280
2010	158	1075
2010	142	1225
2010	154	850
2010	167	1465
2010	170	1260
2010	164	1685
2010	161	1560
2010	150	1495
2010	151	1425
2010	170	1405
2010	150	1375
2010	146	1760
2010	159	1695
2010	153	1480
2010	149	1490
2010	148	1340
2010	158	1430
2010	138	1015
2010	158	1420
2010	148	980
2010	164	1490
2010	162	1560
2010	161	1315
2010	178	1615
2010	142	1395
2010	155	1125
2010	167	1480
2010	169	1595
2010	157	1415
2010	157	1535
2010	183	2300
2010	150	1345
2010	152	1320
2010	158	1370
2010	137	1205
2010	141	1190
2010	160	1750
2010	141	1155
2010	146	1330
2010	165	1555
2010	157	1555
2010	141	1305
2010	151	1325
2010	160	1575
2010	152	1480
2010	116	920
2010	152	815
2010	145	1170
2010	143	1060
2010	184	1745
2010	150	1295
2010	125	680
2010	158	1700
2010	151	1390
2010	150	1190
2010	144	1310
2010	155	1250
2010	147	1335
2010	157	1285
2010	159	1315
2010	158	1400
2010	160	1280
2010	159	1370
2010	140	1000
2010	164	1300
2010	145	1260
2010	165	1610
2010	160	1590
2010	154	1400
2010	135	1150
2010	140	1015
2010	141	1145
2010	160	1435
2010	166	1585
2010	150	1210
2010	167	1400
2010	171	1810
2010	168	1635
2010	159	1840
2010	165	1115
2010	162	1590
2010	193	980
2010	138	1290
2010	164	1840
2010	168	1775
2010	151	1250
2010	161	1735
2010	155	1185
2010	160	1390
2010	163	1695
2010	145	1470
2010	149	1535
2010	166	1555
2010	165	1730
2010	168	1835
2010	161	1395
2010	145	1420
2010	148	1165
2010	169	1170
2010	163	1590
2010	156	1435
2010	146	1325
2010	167	1640
2010	144	995
2010	170	1335
2010	152	1410
2010	162	1275
2010	169	1795
2010	150	1670
2010	150	1395
2010	149	1120
2010	156	1470
2010	155	1415
2010	172	1585
2010	160	1515
2010	155	1260
2010	160	1640
2010	158	1505
2010	155	1320
2010	175	1855
2010	153	1330
2010	152	1445
2010	115	845
2010	153	1400
2010	152	1390
2010	153	1625
2010	135	1095
2010	159	1570
2010	154	1255
2010	145	1225
2010	145	1335
2010	140	1410
2010	148	1310
2010	153	1555
2010	160	1795
2010	141	1165
2010	148	1240
2010	145	1190
2010	168	1725
2010	100	355
2010	153	1445
2010	159	1555
2010	154	1515
2010	159	1475
2010	163	1715
2010	132	955
2010	144	1885
2010	139	1080
2010	109	440
2010	113	625
2010	107	615
2010	173	2040
2010	155	1790
2010	164	1300
2010	168	1875
2010	160	1335
2010	156	1050
2010	160	1545
2010	144	1170
2010	150	1145
2010	162	1365
2010	163	1500
2010	165	1745
2010	173	1710
2010	150	1415
2010	159	1560
2010	176	1715
2010	156	1245
2010	176	1655
2010	145	1310
2010	150	1295
2010	138	1020
2010	162	1340
2010	158	1110
2010	151	1025
2010	154	1320
2010	165	1900
2010	145	1155
2010	162	1440
2010	165	1255
2010	167	1630
2010	158	1695
2010	167	1690
2010	169	1905
2010	146	1385
2010	153	1595
2010	171	1810
2010	149	1275
2010	141	1075
2010	150	1340
2010	158	1370
2010	154	1525
2010	152	1170
2010	166	1855
2010	158	1155
2010	157	1605
2010	167	1520
2010	155	1410
2010	156	1120
2010	142	1050
2010	164	1365
2010	160	1520
2010	169	1605
2010	166	1180
2010	136	1110
2010	155	1000
2010	158	1205
2010	174	1505
2010	174	1730
2010	128	665
2010	165	1510
2010	180	1510
2010	150	1700
2010	156	1375
2010	166	1780
2010	167	1545
2010	162	1485
2010	160	1145
2010	165	1625
2010	147	1195
2010	158	1380
2010	160	1755
2010	171	1660
2010	149	1095
2010	160	1355
2010	157	1405
2010	156	1215
2010	156	1655
2010	171	1880
2010	153	1265
2010	170	1630
2010	161	1055
2010	103	270
2010	138	980
2010	151	1355
2010	141	1190
2010	144	1060
2010	163	1490
2010	145	990
2010	171	1590
2010	144	1160
2010	164	1505
2010	152	1420
2010	161	1520
2010	160	1625
2010	155	1500
2010	151	1270
2010	166	1980
2010	136	1015
2010	156	1330
2010	146	920
2010	146	1340
2010	138	1050
2010	150	1340
2010	152	1210
2010	155	1250
2010	146	1645
2010	154	1230
2010	157	1680
2010	165	2095
2010	155	1790
2010	155	1690
2010	165	1940
2010	136	1385
2010	156	1845
2010	171	1795
2010	158	1610
2010	154	1555
2010	155	1395
2010	155	1430
2010	152	1605
2010	167	2010
2010	125	1045
2010	150	1430
2010	123	985
2010	151	1770
2010	149	1460
2010	155	1635
2010	138	1365
2010	160	1870
2010	170	1905
2010	153	1910
2010	151	1340
2010	169	1915
2010	156	1670
2010	165	2025
2010	168	2045
2010	165	1450
2010	146	1515
2010	145	1375
2010	170	1995
2010	141	1460
2010	149	1660
2010	151	1655
2010	167	1785
2010	173	1880
2010	178	1900
2010	166	1995
2010	142	1590
2010	143	1415
2010	145	1835
2010	146	1485
2010	173	2370
2010	195	2585
2010	159	1725
2010	150	1820
2010	172	2085
2010	147	1560
2010	163	1730
2010	160	1635
2010	163	1820
2010	156	1630
2010	175	2270
2010	167	2010
2010	143	1205
2010	152	1335
2010	180	2350
2010	130	1385
2010	146	1580
2010	140	1460
2010	162	1620
2010	152	1485
2010	158	1550
2010	168	2425
2010	157	1630
2010	166	1855
2010	144	1505
2010	160	1905
2010	168	1785
2010	168	1945
2010	130	895
2010	161	1495
2010	153	1460
2010	158	1880
2010	170	1795
2010	146	1870
2010	157	1475
2010	143	1525
2010	161	1990
2010	167	1600
2010	160	1535
2010	140	1230
2010	141	1250
2010	133	995
2010	135	1005
2010	137	1230
2010	175	1875
2010	147	1675
2010	164	1475
2010	157	1340
2010	165	1690
2010	143	1125
2010	143	1310
2010	163	1605
2010	175	1720
2010	157	1400
2010	167	1630
2010	146	1305
2010	166	1560
2010	156	1410
2010	155	1285
2010	157	1620
2010	161	1570
2010	155	1860
2010	155	1650
2010	171	1860
2010	144	1425
2010	150	1310
2010	148	1310
2010	153	1550
2010	149	1485
2010	161	1860
2010	138	1220
2010	159	1475
2010	158	1770
2010	148	1445
2010	138	950
2010	146	1415
2010	149	1480
2010	139	1410
2010	159	1740
2010	168	1510
2010	172	1860
2010	143	1290
2010	193	2225
2010	150	1390
2010	155	1860
2010	183	1550
2010	169	2360
2010	175	2070
2010	155	1920
2010	145	1815
2010	165	1490
2010	143	1335
2010	154	1410
2010	170	1940
2010	166	1705
2010	149	1490
2010	156	1265
2010	153	1970
2010	155	1630
2010	173	1725
2010	155	1565
2010	140	1420
2010	153	1720
2010	151	1720
2010	160	1245
2010	133	905
2010	130	855
2010	132	930
2010	141	1265
2010	165	1610
2010	152	1460
2010	178	1860
2010	150	1530
2010	163	1650
2010	151	1450
2010	145	1160
2010	149	1130
2010	165	1440
2010	136	1125
2010	153	1460
2010	146	1260
2010	145	1240
2010	130	950
2010	170	1555
2010	134	905
2010	165	1375
2010	161	1550
2010	154	1440
2010	150	1245
2010	145	1435
2010	155	1420
2010	137	1420
2010	163	1670
2010	165	1535
2010	165	1565
2010	171	1455
2010	130	1195
2010	151	1300
2010	151	1510
2010	148	1325
2010	165	1695
2010	151	1360
2010	165	1500
2010	145	1445
2010	155	1750
2010	153	1120
2010	145	1160
2010	170	1535
2010	155	1355
2010	162	1670
2010	148	1160
2010	134	1095
2010	135	1140
2010	157	1320
2010	148	1360
2010	149	1345
2010	136	990
2010	130	735
2010	137	750
2010	159	1520
2010	159	1970
2010	142	1450
2010	135	845
2010	151	1295
2010	157	1590
2010	132	960
2010	147	1400
2010	129	860
2010	166	1835
2010	155	1535
2010	136	1390
2010	137	985
2010	130	905
2010	164	1675
2010	139	1405
2010	142	850
2010	151	1620
2010	142	1320
2010	136	985
2010	141	1195
2010	156	1275
2010	155	1625
2010	155	1715
2010	166	1445
2010	178	2050
2010	150	1565
2010	148	1430
2010	134	1150
2010	139	1170
2010	145	1190
2010	137	1360
2010	165	1530
2010	156	1750
2010	156	1635
2010	155	1595
2010	154	1230
2010	141	1305
2010	145	1340
2010	151	1320
2010	158	1715
2010	149	1490
2010	159	2155
2010	165	1530
2010	166	1910
2010	160	1285
2010	158	1425
2010	161	1295
2010	178	1920
2010	154	1325
2010	147	1385
2010	171	1840
2010	138	1355
2010	167	1855
2010	147	1430
2010	150	1345
2010	110	560
2010	114	605
2010	177	2020
2010	187	1990
2010	161	1740
2010	171	2010
2010	166	1705
2010	139	1320
2010	156	1705
2010	152	1770
2010	140	1235
2010	175	2560
2010	153	1665
2010	140	1390
2010	153	1185
2010	121	710
2010	117	670
2010	155	1355
2010	144	1240
2010	136	1070
2010	178	2175
2010	151	1540
2010	156	1385
2010	140	1205
2010	158	1425
2010	146	1670
2010	138	1200
2010	160	1760
2010	139	1685
2010	136	1410
2010	138	1225
2010	155	1420
2010	157	1305
2010	137	1260
2010	131	1340
2010	145	940
2010	163	1510
2010	170	2005
2010	158	1720
2010	163	1405
2010	153	1795
2010	151	1300
2010	161	2080
2010	147	1630
2010	156	1950
2010	149	1400
2010	174	1960
2010	160	1220
2010	158	1380
2010	121	745
2010	113	680
2010	162	1535
2010	152	1515
2010	142	1285
2010	156	1405
2010	167	1920
2010	169	1800
2010	153	1460
2010	150	1480
2010	161	1800
2010	161	1680
2010	158	830
2010	143	770
2010	153	995
2010	161	1350
2010	94	405
2010	110	420
2010	163	1125
2010	126	680
2010	169	1310
2010	108	375
2010	125	560
2010	127	700
2010	105	415
2010	139	1080
2010	145	1610
2010	151	1275
2010	115	755
2010	130	912
2010	131	1110
2010	173	1810
2010	151	1430
2010	155	1315
2010	164	1245
2010	127	1855
2010	150	1265
2010	156	1575
2010	155	1660
2010	137	1455
2010	156	1310
2010	182	1880
2010	182	2070
2010	166	1800
2010	163	1930
2010	165	1805
2010	118	720
2010	155	1955
2010	152	1245
2010	160	1720
2010	182	1665
2010	172	1580
2010	148	1560
2010	161	1665
2010	144	1190
2010	177	2220
2010	146	1195
2010	148	1360
2010	154	1510
2010	160	1935
2010	151	1680
2010	161	1515
2010	170	1901
2010	179	1635
2010	165	1510
2010	165	1850
2010	143	1405
2010	159	1475
2010	148	1770
2010	155	1500
2010	131	890
2010	143	960
2010	146	1110
2010	171	1710
2010	151	1345
2010	170	1855
2010	145	1175
2010	164	1675
2010	143	1570
2010	153	1655
2010	167	1550
2010	164	1995
2010	153	1600
2010	143	1160
2010	131	1235
2010	141	1810
2010	150	1390
2010	159	1510
2010	122	890
2010	155	1395
2010	161	1840
2010	161	1380
2010	155	1580
2010	155	1340
2010	161	2040
2010	165	1695
2010	142	1425
2010	155	1460
2010	140	1680
2010	160	1665
2010	140	920
2010	160	1570
2010	164	1515
2010	150	1310
2010	149	1185
2010	111	390
2010	135	1115
2010	126	1050
2010	108	320
2010	107	280
2010	154	990
2010	150	1635
2010	119	755
2010	119	710
2010	149	1155
2010	128	820
2010	157	975
2010	161	1455
2010	131	775
2010	150	1405
2010	127	910
2010	148	1300
2010	154	1140
2010	156	1555
2010	155	1470
2010	170	2290
2010	164	1910
2010	157	1355
2010	155	1450
2010	145	1340
2010	166	1325
2010	137	1010
2010	155	1225
2010	155	1735
2010	140	1005
2010	111	600
2010	137	1060
2010	148	1910
2010	163	1320
2010	156	1300
2010	158	1340
2010	160	1700
2010	158	1665
2010	166	1830
2010	155	1320
2010	143	1110
2010	127	700
2010	159	1565
2010	152	1480
2010	158	1165
2010	145	1675
2010	128	775
2010	156	1285
2010	140	1170
2010	148	1135
2010	164	1435
2010	155	1435
2010	147	1115
2010	156	1170
2010	156	1675
2010	158	1515
2010	158	1355
2010	135	1165
2010	138	1055
2010	162	1470
2010	150	905
2010	178	1905
2010	144	1015
2010	150	1205
2010	161	1365
2010	159	1465
2010	165	1960
2010	153	1205
2010	163	1565
2010	147	1085
2010	150	1255
2010	146	1385
2010	146	1565
2010	146	1380
2010	144	1290
2010	154	1520
2010	147	1495
2010	159	1630
2010	154	1420
2010	150	1410
2010	156	1370
2010	150	1275
2010	135	830
2010	155	1300
2010	175	1410
2010	160	1595
2010	153	1465
2010	160	1570
2010	160	1910
2010	158	1905
2010	136	1385
2010	156	1485
2010	156	1805
2010	155	1560
2010	150	1280
2010	153	1260
2010	147	1230
2010	130	960
2010	150	1160
2010	146	1045
2010	139	875
2010	148	1135
2010	150	1105
2010	139	860
2010	146	1000
2010	155	1205
2010	170	1520
2010	146	1045
2010	161	1610
2010	154	1170
2010	145	1150
2010	146	1285
2010	156	1470
2010	155	1370
2010	157	1220
2010	159	1270
2010	144	1225
2010	153	1205
2010	151	1105
2010	168	1310
2010	155	1215
2010	158	1265
2010	156	1235
2010	148	1215
2010	174	1490
2010	148	1100
2010	167	1380
2010	145	805
2010	162	1085
2010	159	1725
2010	166	1330
2010	153	1080
2010	149	1210
2010	145	820
2010	157	1480
2010	138	1025
2010	140	985
2010	124	730
2010	171	1385
2010	150	1130
2010	145	950
2010	126	740
2010	139	1090
2010	157	1260
2010	147	1100
2010	155	1300
2010	150	1105
2010	174	1505
2010	144	1120
2010	158	1425
2010	138	1010
2010	145	1190
2010	144	1095
2010	156	1385
2010	138	880
2010	145	1055
2010	165	1470
2010	155	1255
2010	162	1230
2010	168	1590
2010	150	1210
2010	160	1225
2010	162	1355
2010	145	1165
2010	149	1135
2010	152	1300
2010	151	1285
2010	158	1425
2010	154	1410
2010	138	925
2010	147	1195
2010	151	1245
2010	120	735
2010	151	1355
2010	154	1075
2010	141	1165
2010	134	1080
2010	145	1060
2010	109	330
2010	140	1030
2010	143	1355
2010	143	1110
2010	163	1480
2010	194	1690
2010	153	1605
2010	169	1870
2010	134	865
2010	149	1085
2010	160	1580
2010	168	1975
2010	170	1605
2010	165	1945
2010	148	1460
2010	148	1160
2010	149	1435
2010	128	985
2010	178	1570
2010	140	1030
2010	158	1390
2010	165	1545
2010	158	1900
2010	158	1645
2010	151	1340
2010	146	1385
2010	161	1615
2010	157	1570
2010	166	1720
2010	153	1255
2010	158	1325
2010	131	820
2010	139	1060
2010	176	1835
2010	173	1730
2010	163	1470
2010	156	1525
2010	157	1425
2010	168	1900
2010	170	1970
2010	183	1840
2010	145	1335
2010	173	1560
2010	143	955
2010	159	1335
2010	123	680
2010	126	855
2010	127	720
2010	150	1330
2010	139	1270
2010	178	2075
2010	164	1650
2010	154	1430
2010	181	1915
2010	165	1730
2010	158	1525
2010	171	1755
2010	163	1570
2010	161	1220
2010	141	1120
2010	146	1205
2010	134	825
2010	133	830
2010	160	1590
2010	154	1565
2010	163	1650
2010	153	1610
2010	160	1840
2010	149	1505
2010	169	1575
2010	163	1755
2010	156	1465
2010	146	1145
2010	148	1250
2010	145	1130
2010	130	960
2010	126	820
2010	126	865
2010	158	1565
2010	153	1530
2010	128	770
2010	147	1290
2010	173	1700
2010	145	975
2010	163	850
2010	107	420
2010	127	600
2010	152	1080
2010	162	970
2010	111	560
2010	120	680
2010	112	590
2010	121	650
2010	154	1165
2010	106	520
2010	114	535
2010	118	635
2010	107	480
2010	140	1080
2010	172	1550
2010	152	1545
2010	153	1490
2010	140	1320
2010	167	1340
2010	150	1450
2010	136	1230
2010	144	1250
2010	155	1340
2010	154	1500
2010	147	980
2010	155	1515
2010	150	1250
2010	158	1185
2010	131	1010
2010	170	1695
2010	185	1830
2010	162	1120
2010	157	1880
2010	160	1665
2010	164	1620
2010	151	1600
2010	165	1460
2010	181	1910
2010	168	1525
2010	115	850
2010	155	1385
2010	151	1130
2010	141	1110
2010	145	1430
2010	151	1540
2010	162	1485
2010	139	1205
2010	156	1945
2010	173	1865
2010	161	1340
2010	167	1650
2010	148	1190
2010	148	1135
2010	134	1110
2010	154	1320
2010	153	1370
2010	157	1370
2010	137	975
2010	156	1505
2010	158	1240
2010	166	1480
2010	170	1490
2010	150	1055
2010	154	1485
2010	150	1345
2010	146	1385
2010	155	1420
2010	174	1595
2010	122	700
2010	133	775
2010	134	930
2010	160	1760
2010	166	1885
2010	154	1360
2010	157	1220
2010	143	1075
2010	138	1015
2010	154	1625
2010	160	1345
2010	158	1730
2010	151	1345
2010	163	1580
2010	149	1420
2010	151	1265
2010	165	1540
2010	146	1490
2010	115	600
2010	111	570
2010	139	1170
2010	156	1360
2010	171	1705
2010	145	1245
2010	149	1425
2010	141	1310
2010	148	720
2010	141	955
2010	145	1075
2010	152	805
2010	140	885
2010	151	1540
2010	155	1740
2010	149	1465
2010	153	1810
2010	151	1215
2010	136	1040
2010	168	1740
2010	173	1620
2010	154	1360
2010	174	2080
2010	117	830
2010	136	1080
2010	138	1060
2010	130	925
2010	160	1745
2010	151	1460
2010	158	1805
2010	161	1515
2010	160	1515
2010	150	1380
2010	153	1495
2010	165	1540
2010	173	1725
2010	150	1275
2010	157	1510
2010	161	1860
2010	160	1515
2010	156	1505
2010	160	1875
2010	153	1460
2010	188	1930
2010	177	1720
2010	175	1620
2010	173	1940
2010	151	1390
2010	163	1795
2010	175	2180
2010	135	970
2010	149	1320
2010	154	1600
2010	170	1730
2010	170	1600
2010	162	1935
2010	148	1090
2010	145	1485
2010	142	1120
2010	165	1690
2010	161	1970
2010	152	1380
2010	158	1430
2010	133	920
2010	141	1115
2010	160	1450
2010	156	1340
2010	153	1375
2010	170	1815
2010	149	1430
2010	179	1620
2010	172	1735
2010	161	1810
2010	148	1300
2010	158	1640
2010	153	1370
2010	150	1590
2010	150	1705
2010	153	1270
2010	135	1160
2010	160	1470
2010	158	1390
2010	155	1690
2010	151	1420
2010	180	2780
2010	140	1285
2010	143	1370
2010	149	1305
2010	159	1660
2010	159	1600
2010	169	1625
2010	149	1355
2010	175	1865
2010	155	1720
2010	147	1065
2010	134	815
2010	143	1150
2010	118	680
2010	143	1110
2010	134	955
2010	141	1205
2010	168	2105
2010	145	1250
2010	140	1120
2010	159	2050
2010	128	865
2010	170	1810
2010	158	1565
2010	168	1695
2010	148	1400
2010	147	1190
2010	158	1965
2010	136	1330
2010	163	1610
2010	145	1140
2010	167	1610
2010	168	1730
2010	135	1140
2010	169	1570
2010	140	1300
2010	150	1315
2010	150	1375
2010	165	1760
2010	162	1565
2010	158	1685
2010	181	1855
2010	174	2110
2010	161	1730
2010	155	1450
2010	160	1565
2010	168	1665
2010	158	1885
2010	155	1390
2010	151	1100
2010	176	1560
2010	128	885
2010	123	570
2010	128	830
2010	123	760
2010	131	675
2010	130	645
2010	136	930
2010	121	905
2010	154	1420
2010	138	1090
2010	154	1290
2010	144	1195
2010	145	1255
2010	157	1200
2010	143	1230
2010	131	880
2010	131	800
2010	128	1015
2010	159	1495
2010	173	2020
2010	150	1180
2010	157	1650
2010	149	1180
2010	178	1860
2010	158	1685
2010	168	1980
2010	168	1870
2010	167	1665
2010	157	1055
2010	153	1395
2010	129	770
2010	140	1325
2010	161	1765
2010	156	1100
2010	123	925
2010	171	1645
2010	157	1515
2010	156	1670
2010	153	1295
2010	139	1245
2010	156	1560
2010	152	1385
2010	155	1840
2010	166	1625
2010	177	2080
2010	145	1260
2010	117	650
2010	116	340
2010	152	1235
2010	145	830
2010	141	940
2010	129	745
2010	153	1440
2010	134	880
2010	130	740
2010	152	1325
2010	169	1150
2010	159	1365
2010	126	650
2010	162	1490
2010	145	1450
2010	155	1430
2010	145	1060
2010	155	1245
2010	129	1025
2010	166	1410
2010	137	1285
2010	176	2165
2010	156	1595
2010	155	1670
2010	140	1480
2010	151	1640
2010	175	1640
2010	151	1620
2010	179	1735
2010	165	1590
2010	169	1880
2010	171	1750
2010	161	1800
2010	158	1505
2010	166	1680
2010	162	1550
2010	160	1455
2010	161	1705
2010	159	1535
2010	171	2025
2010	177	1670
2010	175	1490
2010	156	1660
2010	163	1605
2010	165	1585
2010	136	1045
2010	151	1200
2010	133	1155
2010	167	1940
2010	153	1345
2010	174	1675
2010	166	1760
2010	159	1610
2010	157	1475
2010	135	1155
2010	160	1365
2010	139	895
2010	151	1385
2010	179	2125
2010	157	1465
2010	173	1740
2010	159	1520
2010	162	1530
2010	156	1605
2010	158	1250
2010	164	1580
2010	174	2040
2010	155	1515
2010	168	1980
2010	174	1590
2010	145	1410
2010	175	2150
2010	147	1520
2010	138	1580
2010	164	1940
2010	136	1000
2010	156	1580
2010	166	1625
2010	168	1645
2010	170	1780
2010	164	1290
2010	152	1560
2010	160	1620
2010	166	1615
2010	145	1260
2010	147	1555
2010	147	1395
2010	163	1370
2010	145	1235
2010	182	2250
2010	153	1345
2010	161	1575
2010	155	1530
2010	123	710
2010	113	560
2010	113	665
2010	118	645
2010	121	610
2010	113	500
2010	127	860
2010	175	2050
2010	161	1480
2010	163	1810
2010	142	860
2010	129	1095
2010	161	1320
2010	164	1530
2010	157	1700
2010	158	1415
2010	160	1860
2010	110	1775
2010	170	1180
2010	157	1315
2010	153	1655
2010	132	1125
2010	145	1465
2010	159	1470
2010	166	1870
2010	175	1645
2010	163	1810
2010	135	725
2010	165	1445
2010	171	1975
2010	165	1980
2010	141	1465
2010	126	805
2010	133	1185
2010	156	1455
2010	154	1400
2010	158	1865
2010	170	1865
2010	151	1325
2010	139	1110
2010	121	715
2010	160	1465
2010	167	1830
2010	138	815
2010	122	730
2010	169	1515
2010	130	840
2010	163	2100
2010	173	1775
2010	167	1470
2010	179	1690
2010	160	1685
2010	165	1590
2010	171	1540
2010	185	1850
2010	173	1805
2010	150	1575
2010	150	1380
2010	171	1985
2010	155	1615
2010	162	1480
2010	155	1410
2010	140	1465
2010	158	1820
2010	127	820
2010	128	785
2010	157	1645
2010	159	1675
2010	182	1800
2010	154	1515
2010	153	1530
2010	167	1610
2010	157	1495
2010	145	1630
2010	138	1415
2010	167	1620
2010	175	1745
2010	158	1620
2010	173	2130
2010	145	1045
2010	170	1850
2010	152	1335
2010	150	1495
2010	166	1345
2010	165	1690
2010	129	800
2010	158	1505
2010	143	1080
2010	147	1570
2010	162	1320
2010	142	1010
2010	165	1685
2010	148	1140
2010	162	1400
2010	155	1160
2010	143	1240
2010	146	1165
2010	152	1290
2010	149	1495
2010	164	1600
2010	151	1615
2010	160	1485
2010	162	1425
2010	160	1545
2010	157	1185
2010	142	1150
2010	116	750
2010	115	625
2010	149	1155
2010	153	1495
2010	155	1430
2010	147	1235
2010	155	1105
2010	135	1040
2010	156	1350
2010	160	1605
2010	163	1465
2010	162	1950
2010	149	1025
2010	149	1195
2010	146	1290
2010	140	1085
2010	145	1150
2010	152	1370
2010	150	1410
2010	160	1305
2010	155	1415
2010	166	1470
2010	158	1375
2010	136	1080
2010	148	1340
2010	144	1180
2010	158	1385
2010	160	930
2010	162	1440
2010	140	970
2010	141	935
2010	149	1340
2010	151	1155
2010	158	1015
2010	157	1390
2010	166	1285
2010	135	970
2010	145	1385
2010	148	1040
2010	151	1365
2010	142	945
2010	138	940
2010	159	1420
2010	176	1660
2010	159	1520
2010	150	1200
2010	167	1270
2010	150	1420
2010	109	595
2010	115	640
2010	149	1120
2010	165	1420
2010	150	1390
2010	145	1230
2010	160	1480
2010	156	1205
2010	158	1465
2010	165	1490
2010	143	1210
2010	143	1235
2010	162	1440
2010	161	1515
2010	125	630
2010	168	1045
2010	122	695
2010	156	1045
2010	150	1005
2010	102	455
2010	148	980
2010	165	1735
2010	170	1890
2010	150	1450
2010	173	1780
2010	170	1750
2010	148	1325
2010	172	1585
2010	144	930
2010	140	990
2010	159	1585
2010	177	2070
2010	122	845
2010	155	1370
2010	181	1735
2010	153	1330
2010	169	1670
2010	148	1470
2010	170	1845
2010	150	1350
2010	153	1160
2010	143	1325
2010	151	1570
2010	119	810
2010	161	1780
2010	135	735
2010	128	935
2010	163	1670
2010	154	1310
2010	161	1510
2010	185	2170
2010	176	1935
2010	149	1305
2010	158	1565
2010	155	1340
2010	138	910
2010	166	1655
2010	155	1625
2010	151	1195
2010	146	1410
2010	164	1605
2010	125	850
2010	169	1750
2010	153	1655
2010	158	1245
2010	141	1005
2010	144	1190
2010	144	1380
2010	158	1690
2010	144	1150
2010	153	1340
2010	145	1295
2010	160	1600
2010	158	1450
2010	169	1895
2010	142	1115
2010	138	1120
2010	138	865
2010	186	1990
2010	132	820
2010	145	1040
2010	156	1615
2010	156	1130
2010	150	1465
2010	157	1575
2010	138	1125
2010	177	1855
2010	156	1510
2010	158	1510
2010	145	1405
2010	143	1200
2010	162	1645
2010	153	1075
2010	167	1660
2010	126	730
2010	162	1795
2010	151	1475
2010	163	1495
2010	119	640
2010	157	1425
2010	140	850
2010	117	350
2010	108	430
2010	102	490
2010	102	415
2010	112	495
2010	120	605
2010	106	500
2010	108	540
2010	123	710
2010	143	920
2010	174	1990
2010	152	1570
2010	162	1695
2010	155	1610
2010	130	925
2010	131	975
2010	161	1920
2010	142	1235
2010	164	1675
2010	151	1560
2010	160	1635
2010	167	1495
2010	147	1125
2010	144	1415
2010	166	1830
2010	140	1300
2010	150	1450
2010	157	1675
2010	168	2080
2010	162	1700
2010	129	810
2010	117	890
2010	139	1140
2010	154	1850
2010	154	1585
2010	145	1505
2010	160	1740
2010	164	1665
2010	153	1380
2010	164	1870
2010	150	1395
2010	130	900
2010	140	1100
2010	159	1800
2010	155	1610
2010	139	1560
2010	150	1725
2010	167	1760
2010	182	2025
2010	145	1175
2010	148	1340
2010	159	1680
2010	160	1670
2010	141	1185
2010	135	960
2010	154	1520
2010	164	1260
2010	141	1410
2010	131	1145
2010	137	1005
2010	154	1625
2010	153	1480
2010	179	1575
2010	163	1565
2010	145	1355
2010	145	945
2010	168	1810
2010	142	1445
2010	155	1540
2010	164	1535
2010	144	1600
2010	152	1570
2010	140	1125
2010	163	1725
2010	161	1620
2010	160	1160
2010	125	895
2010	173	1835
2010	154	1610
2010	149	1320
2010	172	1995
2010	149	1400
2010	150	1470
2010	144	1200
2010	150	1355
2010	129	640
2010	125	670
2010	113	530
2010	129	640
2010	112	450
2010	109	520
[truncated: 17,443 more rows]

## Sheet: Catch
Shell length class	Catch 2010	Catch 2011	Catch 2012	Catch 2014	Catch 2015	Catch 2016
80	94.5377	0	38.6855	0	0	2256.6
84	94.5377	32.4366	19.3428	0	1262.48	1128.3
88	189.075	64.8732	19.3428	0	360.709	3384.9
92	283.613	32.4366	0	991.391	1082.13	2256.6
96	189.075	32.4366	38.6855	0	2164.26	1128.3
100	709.033	227.056	174.085	991.391	1803.55	4513.19
104	378.151	129.746	193.428	991.391	2524.97	4513.19
108	1134.45	324.366	135.399	2974.17	3246.38	3384.9
112	2127.1	1005.53	174.085	0	2885.67	4513.19
116	2316.17	1524.52	425.541	2974.17	3066.03	6769.79
120	2883.4	2627.36	560.94	6939.74	5410.64	4513.19
124	2741.59	4054.57	1199.25	4956.96	5771.35	10154.7
128	5483.18	6908.99	2533.9	11896.7	9198.09	6769.79
132	6097.68	7460.41	3694.47	21810.6	16953.3	27079.2
136	9501.04	8855.19	6402.46	28750.3	19658.7	23694.3
140	13471.6	11060.9	7930.54	35690.1	23626.5	44003.6
144	15126	11644.7	9613.36	27759	27233.6	49645.1
148	21743.7	16672.4	11837.8	41638.4	33365.6	30464.1
152	26990.5	20337.7	13307.8	38664.3	48515.4	31592.4
156	30441.1	24586.9	15706.3	35690.1	41301.2	39490.4
160	25903.3	18845.7	13385.2	48578.2	43465.5	40618.7
164	18104	13915.3	11392.9	21810.6	24708.6	30464.1
168	16213.2	12553	9845.47	35690.1	24347.9	25950.9
172	9028.35	7655.03	5396.63	7931.13	17674.8	9026.39
176	5435.92	5643.96	3462.36	9913.91	10280.2	5641.49
180	2505.25	2043.5	1740.85	3965.57	11001.6	3384.9
184	1228.99	940.661	696.34	1982.78	5591	0
188	425.42	616.295	483.569	3965.57	4148.16	0
192	236.344	64.8732	251.456	0	2344.61	0
196	283.613	64.8732	96.7139	0	1082.13	1128.3
200	47.2688	0	0	0	901.773	0

## Sheet: Specified parameters
Prameter	Value
M	0.046
Linf	200
k	0.25
